# Supplementary material for: Reply to “A further study of acetylacetone nitrosation”
Source: Royal Society of Chemistry journal article supplement (doi:10.1039/c2ob26719e), 2012-11-21
Supplement: c2ob26719e.pdf [file c2ob26719e.pdf]

## Supplementary Information

### Reply to “A further study of acetylaceton nitrosation”

Luis García-Río,\* Mercedes Parajó and Moisés Pérez-Lorenzo\*

*Kinetic traces in the absence of added-catalyst at increasing AcAc concentrations*

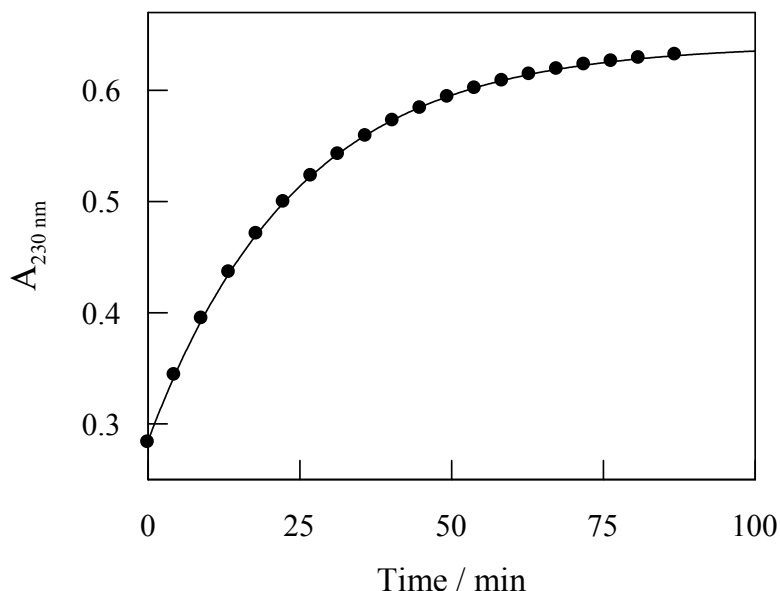

**Figure S1.** Fit of the absorbance-time data at 230 nm to the integrated first-order rate law,  $A_t = A_\infty - (A_\infty - A_0)\exp(-k_{obs}t)$  where  $k_{obs} = (6.852 \pm 0.031) \times 10^{-4} \text{ s}^{-1}$ .  $[\text{AcAc}] = 5.3 \times 10^{-4} \text{ M}$ ;  $[\text{H}^+] = 0.13 \text{ M}$ ;  $[\text{NaNO}_2] = 5.0 \times 10^{-5} \text{ M}$ ; Ionic strength 1.0 M ( $\text{NaClO}_4$ );  $T = 25.0 \text{ }^\circ\text{C}$ . KO

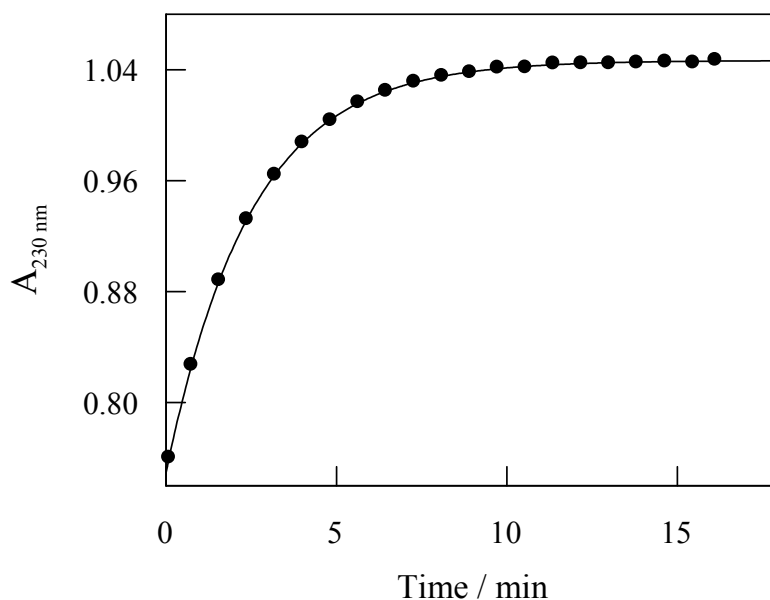

**Figure S2.** Fit of the absorbance-time data at 230 nm to the integrated first-order rate law,  $A_t = A_\infty - (A_\infty - A_0)\exp(-k_{obs}t)$  where  $k_{obs} = (6.700 \pm 0.024) \times 10^{-3} \text{ s}^{-1}$ .  $[\text{AcAc}] = 5.3 \times 10^{-3} \text{ M}$ ;  $[\text{H}^+] = 0.13 \text{ M}$ ;  $[\text{NaNO}_2] = 5.0 \times 10^{-5} \text{ M}$ ; Ionic strength 1.0 M ( $\text{NaClO}_4$ );  $T = 25.0 \text{ }^\circ\text{C}$ .

*Kinetic traces in the absence of added-catalyst at increasing acid concentrations*

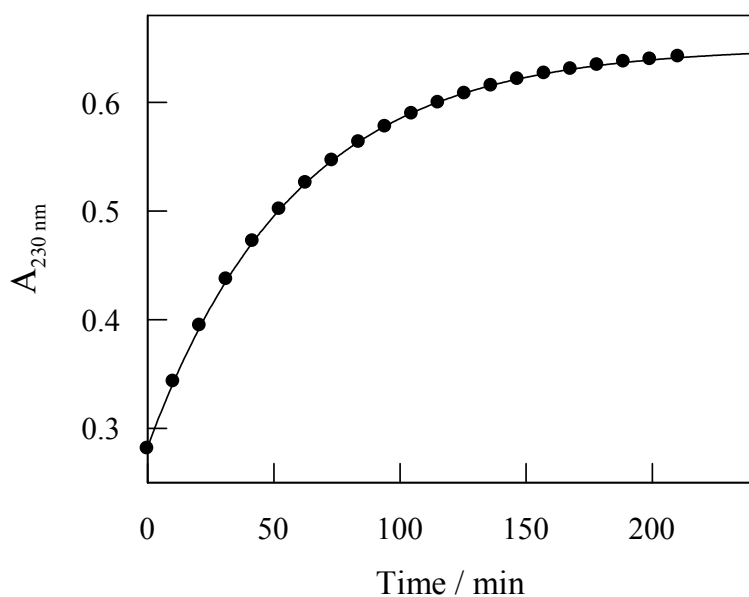

**Figure S3.** Fit of the absorbance-time data at 230 nm to the integrated first-order rate law,  $A_t = A_\infty - (A_\infty - A_0)\exp(-k_{obs}t)$  where  $k_{obs} = (2.870 \pm 0.013) \times 10^{-4} \text{ s}^{-1}$ .  $[\text{AcAc}] = 5.3 \times 10^{-4} \text{ M}$ ;  $[\text{H}^+] = 0.055 \text{ M}$ ;  $[\text{NaNO}_2] = 5.0 \times 10^{-5} \text{ M}$ ; Ionic strength 1.0 M ( $\text{NaClO}_4$ );  $T = 25.0 \text{ }^\circ\text{C}$ .

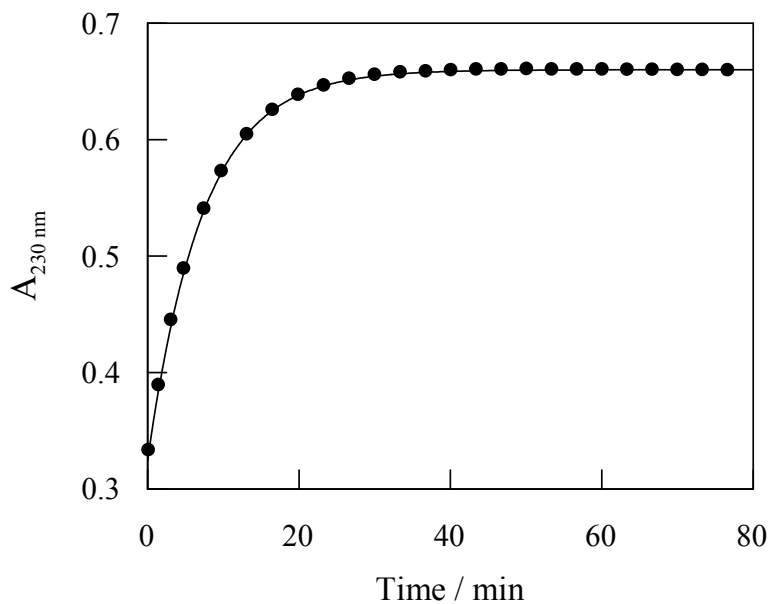

**Figure S4.** Fit of the absorbance-time data at 230 nm to the integrated first-order rate law,  $A_t = A_\infty - (A_\infty - A_0)\exp(-k_{obs}t)$  where  $k_{obs} = (2.285 \pm 0.008) \times 10^{-3} \text{ s}^{-1}$ .  $[\text{AcAc}] = 5.3 \times 10^{-4} \text{ M}$ ;  $[\text{H}^+] = 0.50 \text{ M}$ ;  $[\text{NaNO}_2] = 5.0 \times 10^{-5} \text{ M}$ ; Ionic strength 1.0 M ( $\text{NaClO}_4$ );  $T = 25.0 \text{ }^\circ\text{C}$ .

*Kinetic traces in the presence of nucleophiles*

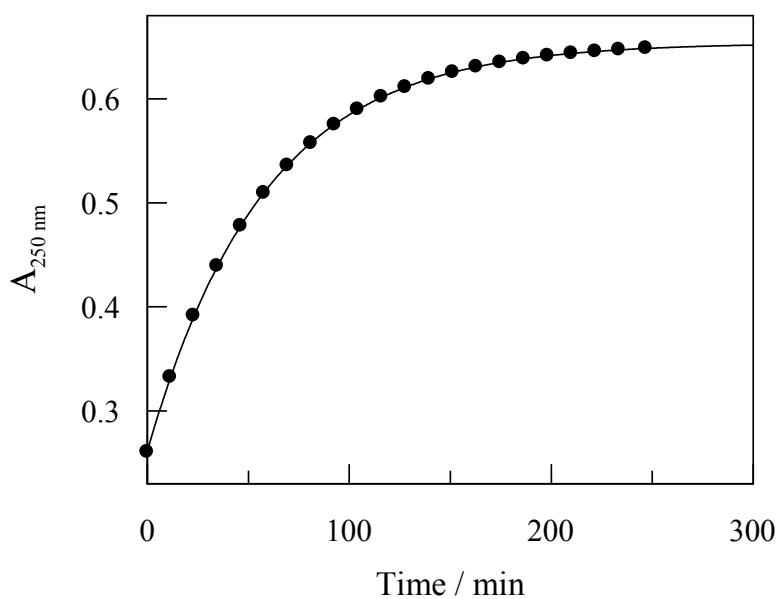

**Figure S3.** Fit of the absorbance-time data at 250 nm to the integrated first-order rate law,  $A_t = A_\infty - (A_\infty - A_0)\exp(-k_{obs}t)$  where  $k_{obs} = (2.895 \pm 0.007) \times 10^{-4} \text{ s}^{-1}$ .  $[\text{AcAc}] = 5.3 \times 10^{-4} \text{ M}$ ;  $[\text{Cl}^-] = 0.10 \text{ M}$ ;  $[\text{H}^+] = 0.052 \text{ M}$ ;  $[\text{NaNO}_2] = 5.0 \times 10^{-5} \text{ M}$ ; Ionic strength 1.0 M ( $\text{NaClO}_4$ );  $T = 25.0 \text{ }^\circ\text{C}$ .

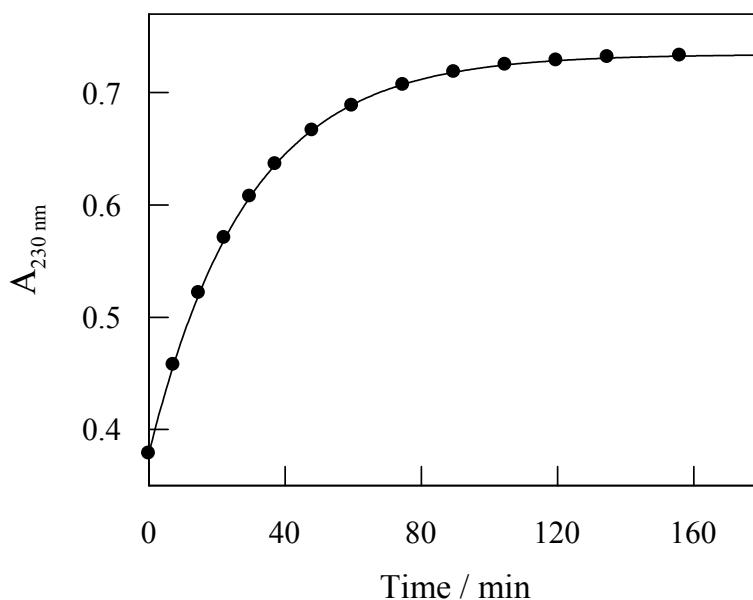

**Figure S4.** Fit of the absorbance-time data at 230 nm to the integrated first-order rate law,  $A_t = A_\infty - (A_\infty - A_0)\exp(-k_{obs}t)$  where  $k_{obs} = (5.775 \pm 0.020) \times 10^{-4} \text{ s}^{-1}$ .  $[\text{AcAc}] = 5.3 \times 10^{-4} \text{ M}$ ;  $[\text{Br}^-] = 0.05 \text{ M}$ ;  $[\text{H}^+] = 0.052 \text{ M}$ ;  $[\text{NaNO}_2] = 5.0 \times 10^{-5} \text{ M}$ ; Ionic strength 1.0 M ( $\text{NaClO}_4$ );  $T = 25.0 \text{ }^\circ\text{C}$ .

*Kinetic traces in the presence of buffer solutions*

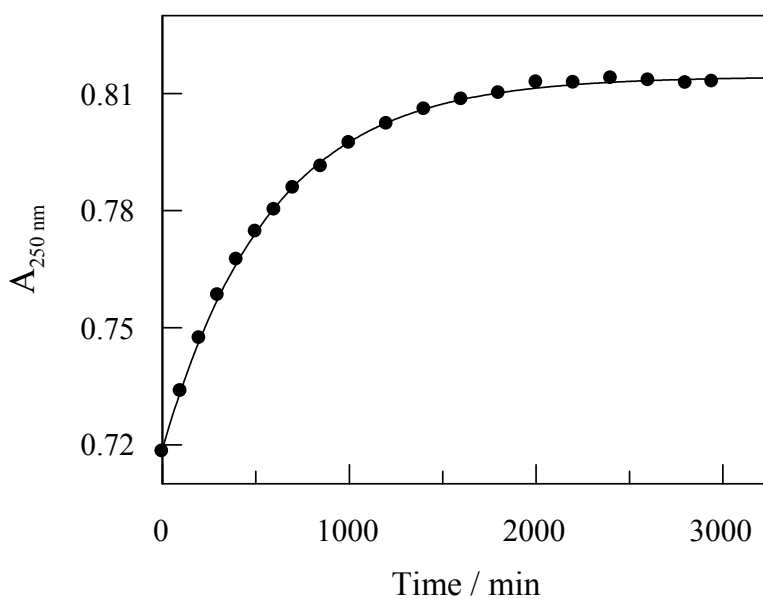

**Figure S5.** Fit of the absorbance-time data at 250 nm to the integrated first-order rate law,  $A_t = A_\infty - (A_\infty - A_0)\exp(-k_{obs}t)$  where  $k_{obs} = (2.898 \pm 0.040) \times 10^{-5} \text{ s}^{-1}$ .  $[\text{AcAc}] = 5.3 \times 10^{-4} \text{ M}$ ;  $[\text{MCA}] = 0.10 \text{ M}$ ;  $\text{pH} = 2.23$ ;  $[\text{NaNO}_2] = 5.0 \times 10^{-5} \text{ M}$ ; Ionic strength 1.0 M ( $\text{NaClO}_4$ );  $T = 25.0 \text{ }^\circ\text{C}$ .

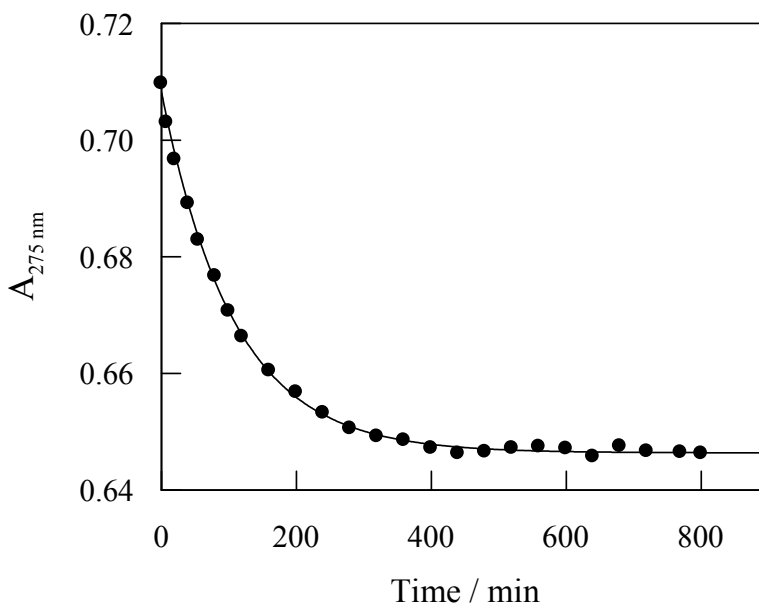

**Figure S6.** Fit of the absorbance-time data at 275 nm to the integrated first-order rate law,  $A_t = A_\infty - (A_\infty - A_0)\exp(-k_{obs}t)$  where  $k_{obs} = (1.560 \pm 0.029) \times 10^{-4} \text{ s}^{-1}$ .  $[\text{AcAc}] = 5.3 \times 10^{-4} \text{ M}$ ;  $[\text{DCA}] = 0.50 \text{ M}$ ;  $\text{pH} = 1.75$ ;  $[\text{NaNO}_2] = 5.0 \times 10^{-5} \text{ M}$ ; Ionic strength 1.0 M ( $\text{NaClO}_4$ );  $T = 25.0 \text{ }^\circ\text{C}$ .
